# Supplementary material for: Marine-Fungi-Derived Gliotoxin Promotes Autophagy to Suppress Mycobacteria tuberculosis Infection in Macrophage
Source: MDPI journal article supplement (doi:10.3390/md21120616), 2023-11-28
Supplement: s1 [file s1]

**Table S1. List of mouse genes and corresponding primers for qRT-PCR assay.**

| No. | Gene symbol   | Full name             | Primers (5' - 3')                                        |
|-----|---------------|-----------------------|----------------------------------------------------------|
| 1   | Actin         |                       | F: CATTGCTGACAGGATGCAGAAGG<br>R: TGCTGGAAGGTGGACAGTGAGG  |
| 2   | TNF- $\alpha$ | Tumor necrosis factor | F: GGTGCCTATGTCTCAGCCTCTT<br>R: GCCATAGAACTGATGAGAGGGAG  |
| 3   | IL-1 $\beta$  | Interleukin 1 beta    | F: TGGACCTTCCAGGATGAGGACA<br>R: GTTCATCTCGGAGCCTGTAGTG   |
| 4   | IL-6          | Interleukin 6         | F: TACCACTTCACAAGTCGGAGGC<br>R: CTGCAAGTGCATCATCGTTGTTC  |
| 5   | IL-10         | Interleukin 10        | F: CGGGAAGACAATAACTGCACCC<br>R: CGGTTAGCAGTATGTTGTCCAGC  |
| 6   | CD80          |                       | F: CCTCAAGTTTCCATGTCCAAGGC<br>R: GAGGAGAGTTGTAACGGCAAGG  |
| 7   | CD86          |                       | F: ACGTATTGGAAGGAGATTACAGCT<br>R: TCTGTCAGCGTTACTATCCCGC |
| 8   | CD163         |                       | F: GGCTAGACGAAGTCATCTGCAC<br>R: CTTCGTTGGTCAGCCTCAGAGA   |
| 9   | CD206         |                       | F: GTTCACCTGGAGTGATGGTTCTC<br>R: AGGACATGCCAGGGTCACCTTT  |

F: forward primer; R: reverse primer.
